# Supplementary material for: A core–shell structured polyacrylonitrile@poly(vinylidene fluoride-hexafluoro propylene) microfiber complex membrane as a separator by co-axial electrospinning
Source: Royal Society of Chemistry journal article supplement (doi:10.1039/c8ra02035c), 2018-01-01
Supplement: c8ra02035c1.pdf [file c8ra02035c1.pdf]

## Supporting Information

### **A core–shell structured polyacrylonitrile@poly(vinylidene fluoride-hexafluoro propylene) microfiber complex membranes as a separator by co-axial electrospinning**

Shuting Yang <sup>abc</sup>, Wenhao Ma <sup>abc</sup>, Aili Wang <sup>abc</sup>, Jifeng Gu <sup>abc</sup>  
and Yanhong Yin <sup>abc\*</sup>

<sup>a</sup> School of Chemistry and Chemical Engineering, Henan Normal University, Xinxiang Henan 453007, P. R. China.

<sup>b</sup> National & Local Joint Engineering Laboratory for Motive Power and Key Materials Xinxiang, Henan 453007, China.

<sup>c</sup> Collaborative Innovation Center of Henan Province for Motive Power and Key Materials, Xinxiang, Henan 453007, China.

\* Corresponding Author: E-mail: [yyh3326439@foxmail.com](mailto:yyh3326439@foxmail.com) (Y.H. Yin)

In order to demonstrate improvement obtained with the mixture material as compared to pure PAN and pure PVDF-HFP, some experiments were carried out. (The pure PAN and PVDF-HFP membranes were fabricated with a single needle at a flow rate of 0.10mm/min with a potential difference of 20 kV)

**Table S1. Porosity and electrolyte uptake of PE, PAN, PVDF-HFP and PAN@PVDF-HFP.**

| Sample                 | PE  | PAN | PVDF-HFP | PAN@PVDF-HFP |
|------------------------|-----|-----|----------|--------------|
| Porosity (%)           | 35  | 73  | 70       | 75           |
| Electrolyte uptake (%) | 130 | 405 | 450      | 420          |

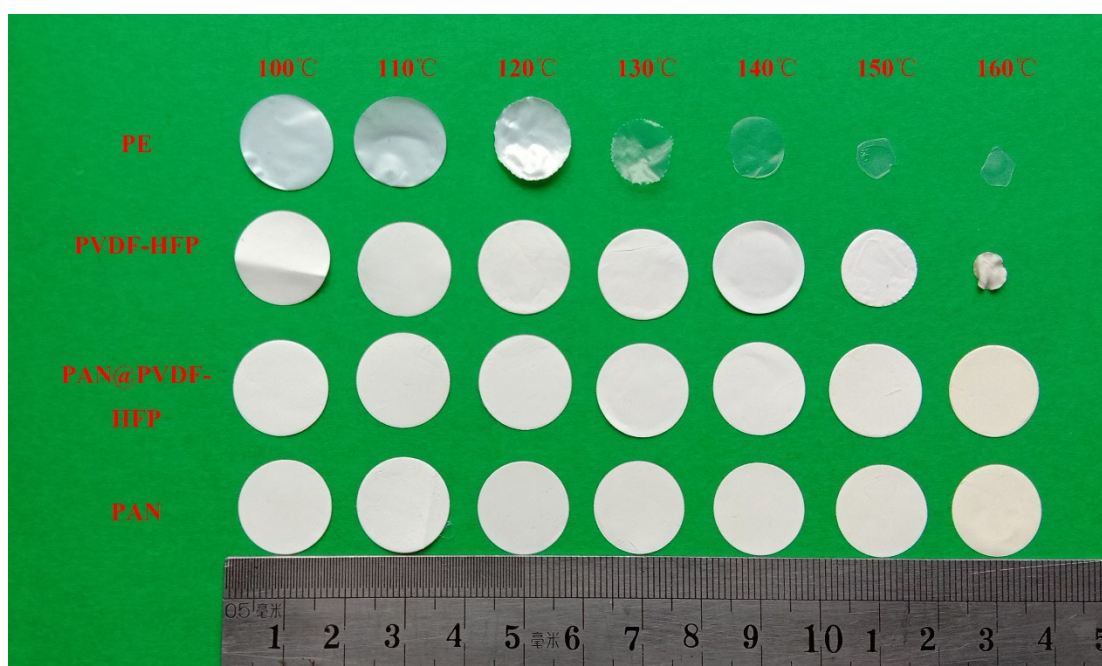

Figure S1. Photograph of the PE, PVDF-HFP, PAN@PVDF-HFP and PAN membrane after heating at different temperatures for 30min.

The thermal shrinkage of pure PAN is better than that of PVDF-HFP and PE. After the combination of PAN and PVDF-HFP, the thermal shrinkage performance is obviously improved.

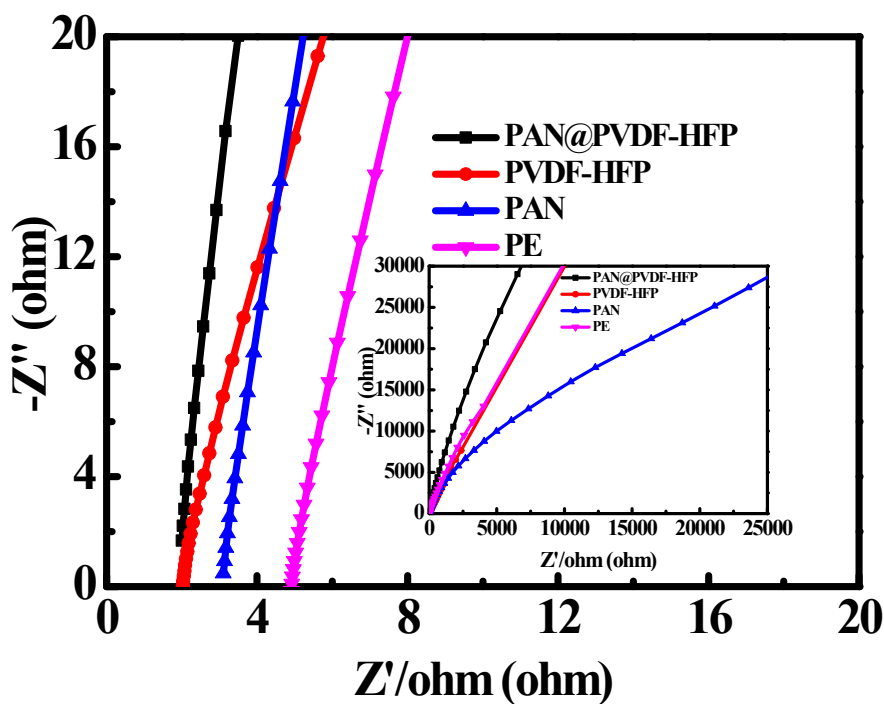

Figure S2. Nyquist plots of the batteries (SS/separator/SS) for the liquid electrolyte-soaked porous PE, PVDF-HFP, PAN@PVDF-HFP and PAN membrane.

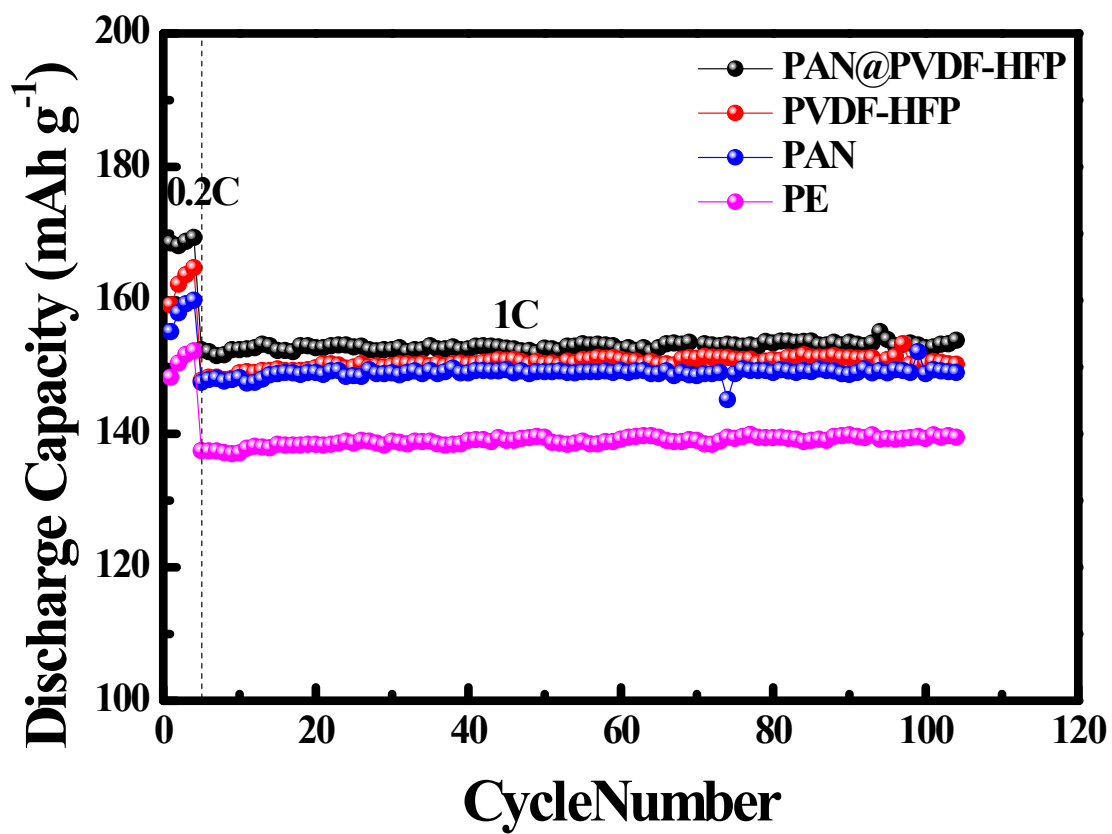

Figure S3. Cycle performance of Li/LiFePO<sub>4</sub> batteries with PAN@PVDF-HFP, PVDF-HFP, PAN and PE membrane.

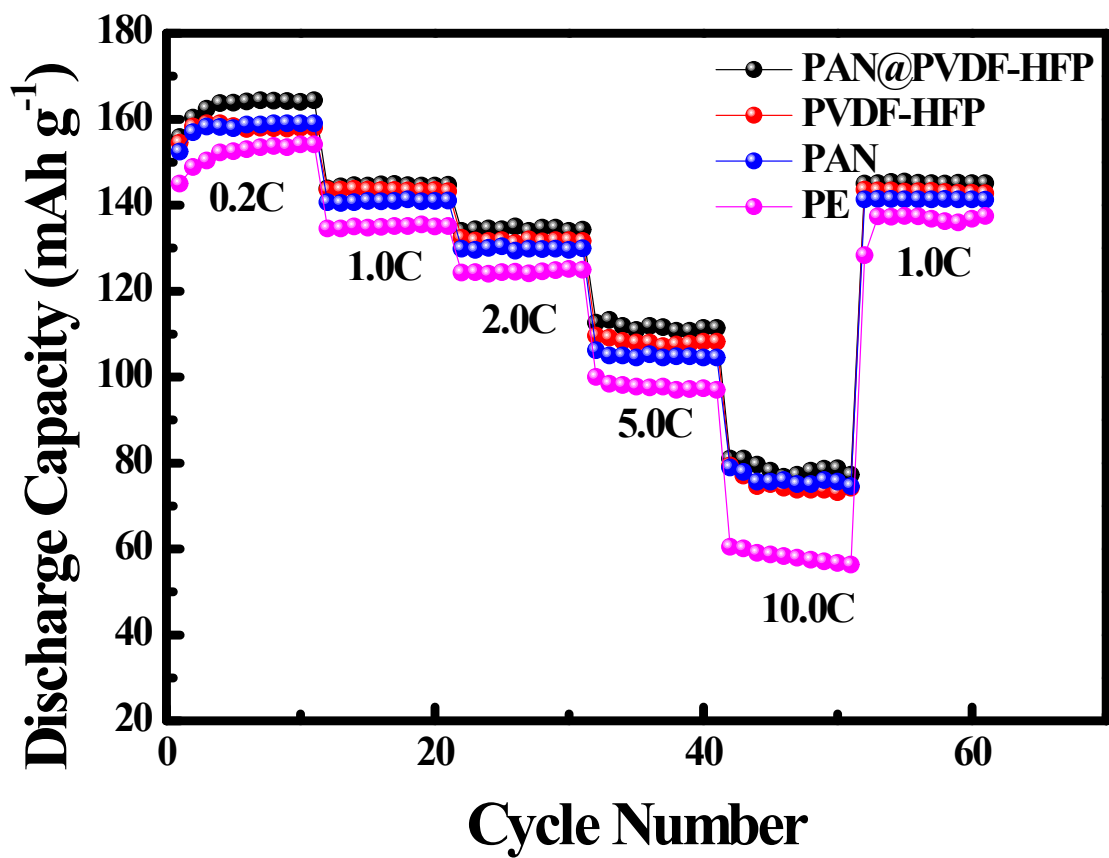

Figure S4. C-rate performance of Li/LiFePO<sub>4</sub> batteries with PAN@PVDF-HFP, PVDF-HFP, PAN and PE membrane.
